# Supplementary material
Source: PubMed Central journal article supplement (PMC7255791)
Supplement: NIHPP2020.04.21.042911-supplement-1.pdf [file NIHPP2020.04.21.042911-supplement-1.pdf]

418 **Supplemental Tables**419 **Supplemental Table 1. Antibodies tested for detecting SARS-CoV-2 in FFPE specimens**

| <b>Antibody</b>                             | <b>Source</b>                         | <b>Catalog number</b> | <b>Immunogen</b>              | <b>Clonality</b> | <b>IHC Suitability (FFPE Specimen)</b> |
|---------------------------------------------|---------------------------------------|-----------------------|-------------------------------|------------------|----------------------------------------|
| Rabbit anti-SARS-CoV spike glycoprotein (S) | Novus Biologicals, Littleton, CO, USA | NB100-56048           | SARS-CoV S residues 288–303   | Polyclonal       | No                                     |
| Rabbit anti-SARS-CoV spike glycoprotein (S) | Novus Biologicals, Littleton, CO, USA | NB100-56578           | SARS-CoV S residues 1124–1140 | Polyclonal       | No                                     |

|                                                |                                        |                |                                     |            |     |
|------------------------------------------------|----------------------------------------|----------------|-------------------------------------|------------|-----|
| Rabbit anti-SARS-CoV-2 spike glycoprotein (S)  | Sino Biological, Chesterbrook, PA, USA | 40150-R007     | Recombinant SARS-CoV-2 S subunit S1 | Monoclonal | No  |
| Rabbit anti-SARS-CoV spike glycoprotein (S)    | Sino Biological, Chesterbrook, PA, USA | 40150-T62-COV2 | Recombinant SARS-CoV S subunit S1   | Polyclonal | Yes |
| Rabbit anti-SARS-CoV nucleocapsid protein (NP) | Sino Biological, Chesterbrook, PA, USA | 40143-R001     | Recombinant SARS-CoV NP             | Monoclonal | No  |

|                                                |                                            |            |                              |            |     |
|------------------------------------------------|--------------------------------------------|------------|------------------------------|------------|-----|
| Rabbit anti-SARS-CoV nucleocapsid protein (NP) | Thermo Fisher Scientific, Waltham, MA, USA | PA1-41098  | SARS-CoV NP residues 399–411 | Polyclonal | No  |
| Mouse anti-SARS-CoV nucleocapsid protein (NP)  | Sino Biological, Chesterbrook, PA, USA     | 40143-MM05 | Recombinant SARS-CoV NP      | Monoclonal | Yes |

421 **Supplemental Table 2. RNAscope ISH probes suitable for detecting SARS-CoV-2 RNA in FFPE specimens**

| <b>Probe</b>               | <b>Catalog number (Advanced Cell Diagnostics, Newark, CA, USA)</b> | <b>Probe length</b> | <b>Channel</b> | <b>Target</b>                                                                |
|----------------------------|--------------------------------------------------------------------|---------------------|----------------|------------------------------------------------------------------------------|
| Positive-sense RNA probe 1 | 848561                                                             | 20 ZZ               | C1             | Genomic RNA fragment 21631-23303 (RefSeq #NC_045512.2)                       |
| Positive-sense RNA probe 2 | 854841                                                             | 40 ZZ               | C1             | Genomic RNA fragment 21571-25392 (GenBank #LC528233.1)                       |
| Negative-sense RNA probe 1 | 845701                                                             | 20 ZZ               | C1             | Reverse complement of genomic RNA fragment 21631-23303 (RefSeq #NC_045512.2) |
| Negative-sense RNA probe 2 | 854851                                                             | 40 ZZ               | C3             | Reverse complement of genomic RNA fragment 290-10849 (GenBank #LC528233.1)   |

422
